# Supplementary material for: A deep blue thermally activated delayed fluorescence emitter: balance between charge transfer and color purity
Source: Royal Society of Chemistry journal article supplement (doi:10.1039/d1tc05027c), 2022-01-01
Supplement: d1tc05027c1.pdf [file d1tc05027c1.pdf]

## *Supplementary information*

*for*

### **Deep blue thermally activated delayed fluorescence emitter: a balance between charge transfer and color purity**

Bahadur Sk, Ezhaikudiyar Ravindran, Upasana Deori, Nisha Yadav, Gyana Prakash Nanda, Pachaiyappan Rajamalli,\*

Materials Research Centre, Indian Institute of Science (IISc) Bangalore, C. V. Raman Road, Bengaluru, 560012, Karnataka, India

Email-[rajamalli@iisc.ac.in](mailto:rajamalli@iisc.ac.in)

#### **Contents**

|                                                                                                                                                                                                            |     |
|------------------------------------------------------------------------------------------------------------------------------------------------------------------------------------------------------------|-----|
| 1. Materials and Methods .....                                                                                                                                                                             | S1  |
| 1.1 Chemicals:.....                                                                                                                                                                                        | S1  |
| 1.2 Instrumentation: .....                                                                                                                                                                                 | S1  |
| 2. Synthesis and Characterizations .....                                                                                                                                                                   | S2  |
| 2.1 Synthesis of (4-Bromophenyl)(6-bromopyridin-3-yl)methanone (3BPy) <sup>1</sup> .....                                                                                                                   | S2  |
| 2.2 Synthesis of (4-(3,6-di- <i>tert</i> -butyl-9 <i>H</i> -carbazol-9-yl)phenyl)(6-(3,6-di- <i>tert</i> -butyl-9 <i>H</i> -carbazol-9-yl)pyridin-3-yl)methanone (3BPy- <i>p</i> DTC) <sup>1</sup> : ..... | S2  |
| 3. Computational calculations and crystal structure .....                                                                                                                                                  | S3  |
| 4. Spectroscopic Characterizations .....                                                                                                                                                                   | S6  |
| 4.1 Electronic absorption: .....                                                                                                                                                                           | S6  |
| 4.2 Emission spectroscopy:.....                                                                                                                                                                            | S7  |
| 4.3 Lippert-Mataga Equation: .....                                                                                                                                                                         | S8  |
| 4.4 Fluorescence quantum yield measurement: .....                                                                                                                                                          | S10 |
| 4.5 Time-resolved spectroscopy: .....                                                                                                                                                                      | S10 |
| 5. Electrochemical measurement .....                                                                                                                                                                       | S11 |
| 6. Thermal stability and photostability .....                                                                                                                                                              | S12 |
| 7. Device Fabrication.....                                                                                                                                                                                 | S13 |
| 8. References .....                                                                                                                                                                                        | S17 |
| 9. NMR Spectra .....                                                                                                                                                                                       | S18 |

## 1. Materials and Methods

### 1.1 Chemicals:

All chemicals were used as received unless otherwise stated. The chemicals were received from Sigma-Aldrich, Merck India and Alfa aesar.

### 1.2 Instrumentation:

The  $^1\text{H}$  and  $^{13}\text{C}$  NMR spectra were recorded by using Bruker Avance 400 spectrometer. The HRMS were measured using MAT-95XL HRMS or MStation. The UV-visible absorption spectra were taken on a Hitachi U-3300 spectrophotometer. Fluorescence and phosphorescence spectra were recorded on a Hitachi F-7100 spectrophotometer. The absolute PL quantum efficiency of the doped films were determined using an integrating sphere under  $\text{N}_2$  atmosphere. The time-resolved emission spectra and decays were recorded using an Edinburgh Instruments FLS980 spectrometer equipped with a double monochromator for both excitation and emission, operating in right-angle geometry mode and the highly sensitive photomultiplier tube (RED PMT in Cooled Housing) positioned after a double emission monochromator. Photoluminescence lifetime is measured the integrated device in Edinburgh instrument FLS980 model.

Thermal stability of 3BPy-*p*DTC was studied using TA Instruments Q50 TGA thermogravimetric analyser. The TGA curve which was recorded under  $\text{N}_2$  flow from room temperature to 600 °C for 3BPy-*p*DTC exhibits thermal stability up to 450 °C. The cyclic voltammetry measurement was carried out in deoxygenated dichloromethane (DCM) with 0.1 M tetrabutylammonium hexafluorophosphate (TBAP) as supporting electrolyte in a three-electrode system using BioLogic SP200 potentiostat (BioLogic, France). Platinum (Pt) was used as a working electrode, platinum wire (Pt) and Ag/AgCl were used as counter and reference electrodes, respectively. The scan rate was kept at 100 mV/s for the measurement. The HOMO energy levels were determined from the onset of the oxidation potential using the equation  $-(4.8 \text{ eV} + E_{\text{ox}} (\text{vs } \text{Fc}_{\text{ox}}))$ .

## 2. Synthesis and Characterizations

### 2.1 Synthesis of (4-Bromophenyl)(6-bromopyridin-3-yl)methanone (**3BPY**)<sup>1</sup>

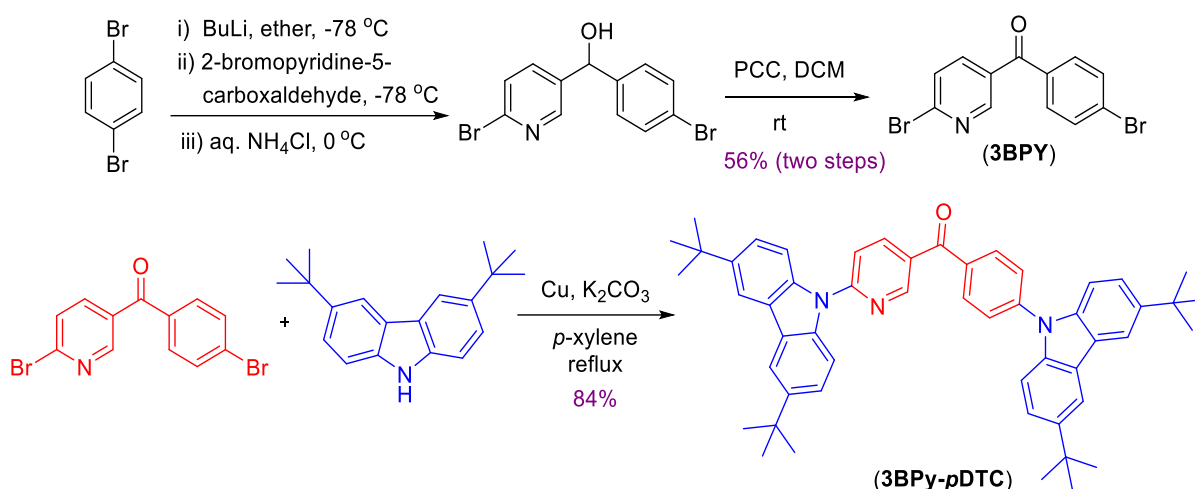

**Scheme S1.** Synthetic Scheme of (4-(3,6-di-*tert*-butyl-9H-carbazol-9-yl)phenyl)(6-(3,6-di-*tert*-butyl-9H-carbazol-9-yl)pyridin-3-yl)methanone (**3BPY-pDTC**).

To a stirred solution of 1,4-dibromobenzene (10.20 g, 43.24 mmol) in THF (100 mL) at -78 °C was added *n*-BuLi (8.65 mL, 21.62 mmol) and stirred for 30 minutes at the same temperature. To this solution, 2-bromopyridine-5-carboxaldehyde (4.00 g, 21.62 mmol) in THF (20 mL) was added drop wise and the reaction mixture was allowed to stir for another 2 h at -78 °C. It was quenched with aq. NH<sub>4</sub>Cl at 0 °C and partitioned between water and DCM. The organic layer was washed with water and dried (Na<sub>2</sub>SO<sub>4</sub>). To this DCM layer was added pyridinium chlorochromate (10.91 g, 50.62 mmol) and stirred at room temperature for 4 h. The reaction mixture was filtered through celite pad and the celite pad was washed with DCM. Evaporation of solvent followed by column chromatographic purification gave **3BPY** in 56% (8.26 g) yield as colourless solid. <sup>1</sup>H NMR (400 MHz, CDCl<sub>3</sub>): δ 8.65 (s, 1 H), 8.68–8.67 (m, 1 H), 7.94–7.91 (m, 4 H), 7.63 (d, *J* = 9.6 Hz, 1 H).

### 2.2 Synthesis of (4-(3,6-di-*tert*-butyl-9H-carbazol-9-yl)phenyl)(6-(3,6-di-*tert*-butyl-9H-carbazol-9-yl)pyridin-3-yl)methanone (**3BPY-pDTC**)<sup>1</sup>:

An oven dried 100 mL double neck round bottom flask fitted with magnetic pallet and a rubber septum. To this round bottom flask (4-Bromophenyl)(6-bromopyridin-3-yl)methanone (**3BPY**) (2.0 g, 5.85 mmol), *t*-butyl carbazole (3.59 g, 11.70 mmol), Cu (0.74 g, 11.69 mmol) and K<sub>2</sub>CO<sub>3</sub> (3.23 g, 23.40 mmol) were added. The system was evacuated and was purged with nitrogen. Then, *p*-xylene (20 mL) was added. The resulting reaction mixture was heated with stirring at 130 °C for 24 h. After completion of the reaction, the reaction mixture was filtered through the combination of celite and silica bed and washed with ethyl acetate (50

mL). The combined filtrate was evaporated under reduced pressure and the residue was purified by column chromatography using ethyl acetate/*n*-hexane as the eluent to afford 84% (3.64 g) of **3BPy-*p*DTC** in spectroscopically pure form. **<sup>1</sup>H NMR** (400 MHz, CDCl<sub>3</sub>) δ 9.20 (dd, *J* = 2.4, 0.7 Hz, 1H), 8.45 (dd, *J* = 8.5, 2.4 Hz, 1H), 8.16 (d, *J* = 1.3 Hz, 3H), 8.14 (s, 1H), 8.12 (d, *J* = 2.0 Hz, 2H), 8.03 (d, *J* = 8.7 Hz, 2H), 7.86 (dd, *J* = 8.6, 0.8 Hz, 1H), 7.81 (d, *J* = 8.5 Hz, 2H), 7.56 (d, *J* = 2.0 Hz, 1H), 7.53 (d, *J* = 2.0 Hz, 1H), 7.52 (d, *J* = 1.3 Hz, 4H), 1.49 (d, *J* = 2.0 Hz, 36H). **<sup>13</sup>C NMR** (101 MHz, CDCl<sub>3</sub>) δ 192.88, 155.27, 151.63, 145.20, 143.95, 142.89, 139.82, 138.66, 137.59, 135.04, 131.85, 129.24, 126.09, 125.37, 124.36, 124.17, 124.08, 116.76, 116.60, 116.40, 111.87, 109.46, 34.95, 34.93, 32.12, 32.02. **HRMS (ESI) mass**: calculated for C<sub>52</sub>H<sub>55</sub>N<sub>3</sub>O is 738.4423 and found 738.4420.

### 3. Computational calculations and crystal structure

A time-dependent density functional theory (TDDFT, spin unrestricted) investigation for **3BPy-*p*DTC** and **3BPy-*m*DTC** were performed using the Gaussian 09 program package in the delta-cluster of SERC facility @IISc. The ground state molecular geometries of D-A compounds were optimized employing density functional theory (DFT) B3LYP hybrid functional and 6-311G(d,p) basis set in Gaussian 09 software.<sup>2</sup> The TDDFT calculations with the same functionality and the basis set was employed to obtain the excited-state structure. GaussView 5.0 and Chemcraft (version 1.8) were used to analyze the molecular orbitals. The iso values ±0.03 were used for the HOMO-LUMO orbital picture and ±0.001 for hole-electron distributions. The spatial distributions of the highest occupied molecular orbital (HOMO) and the lowest unoccupied molecular orbital (LUMO) of **3BPy-*p*DTC** and **3BPy-*m*DTC** in the ground and the excited state were analysed (Fig. 1). The hole and electron distribution were analysed using *Multiwfn* program package (Fig. S1).<sup>3</sup>

**Table S1.** The salient features of the most probable electronic transitions with oscillator strengths of **3BPy-*p*DTC** and **3BPy-*m*DTC** obtained from the TDDFT calculations at B3LYP/6-311G(d,p) level.

| Compound                | $\lambda_{\text{ex}}$ | <i>f</i> | Transitions                          |
|-------------------------|-----------------------|----------|--------------------------------------|
| <b>3BPy-<i>p</i>DTC</b> | 426                   | 0.481    | HOMO to LUMO (93%)                   |
|                         | 402                   | 0.122    | H-1 to LUMO (94%)                    |
|                         | 331                   | 0.068    | H-1 to L+1 (81%), HOMO to L+1 (11%)  |
|                         | 322                   | 0.014    | HOMO to L+1 (66%), HOMO to L+2 (15%) |
|                         | 320                   | 0.071    | HOMO to L+1 (13%), HOMO to L+2 (74%) |
|                         | 312                   | 0.028    | H-1 to L+3 (82%), HOMO to L+3 (11%)  |
| <b>3BPy-<i>m</i>DTC</b> | 464                   | 0.009    | HOMO to LUMO (95%)                   |
|                         | 453                   | 0.009    | H-1 to LUMO (95%)                    |
|                         | 338                   | 0.164    | H-1 to L+1 (26%), HOMO to L+1 (54%)  |

|  |     |       |                                                       |
|--|-----|-------|-------------------------------------------------------|
|  | 319 | 0.065 | H-1 to L+2 (56%), H-1 to L+3 (12%), HOMO to L+4 (23%) |
|  | 314 | 0.075 | H-1 to L+3 (65%), HOMO to L+3 (16%)                   |

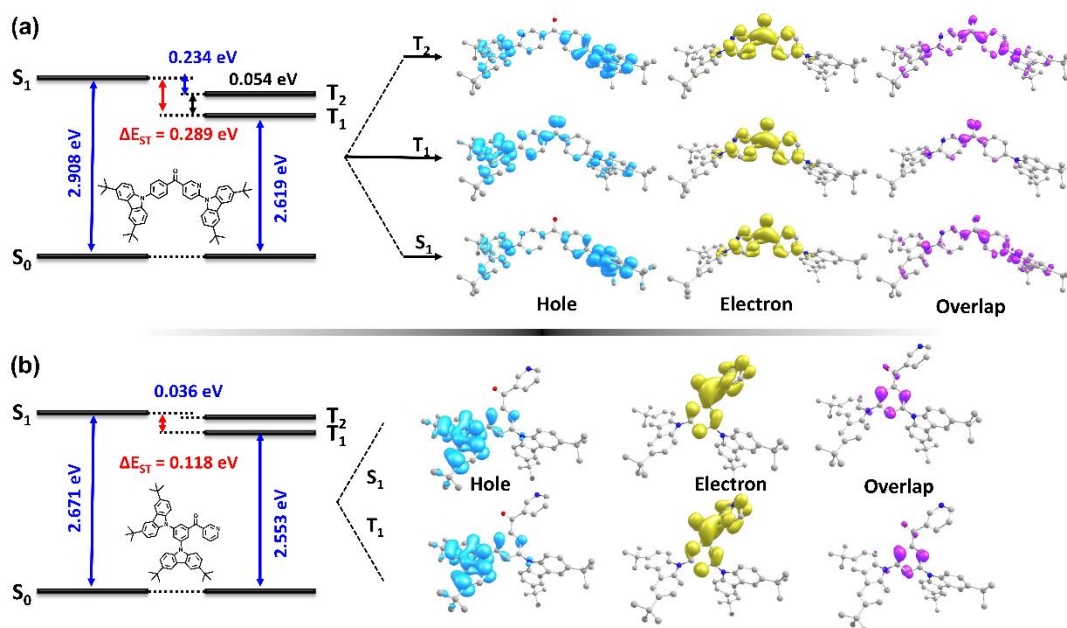

**Fig. S1** A comparative TDDFT calculated energy profile diagram and the natural transition orbitals describing the excitation characters of the S<sub>1</sub>, and T<sub>1</sub> states, the weights of the hole–electron contributions to the excitations of (a) 3BPy-*p*DTC and (b) 3BPy-*m*DTC are shown. (Isovalue = ±0.001)

**Table S2.** Summary of the computational and experimental outcome: Energy of first singlet (S<sub>1</sub>), oscillator strength (*f*), energy of first triplet states (T<sub>1</sub>), and energy gap between S<sub>1</sub> and T<sub>1</sub> (ΔE<sub>ST</sub>) were calculated using DFT at the B3LYP/6-311g(d,p) level in vacuum; overlap integral between hole and electron were calculated using *Multifn*,<sup>3</sup> the experimental Stokes shift Δ $\bar{\nu}$  (cm<sup>-1</sup>), ΔE<sub>ST</sub> measured in degassed 10 μM toluene.

| Compound           | Substitution | Δ $\bar{\nu}$ (cm <sup>-1</sup> ) | S <sub>1</sub> (eV) | <i>f</i> | T <sub>1</sub> (eV) | ΔE <sub>ST</sub> <sup>#</sup> (eV) | ΔE <sub>ST</sub> <sup>##</sup> (eV) | *FWHM (nm) |
|--------------------|--------------|-----------------------------------|---------------------|----------|---------------------|------------------------------------|-------------------------------------|------------|
| 3BPy- <i>p</i> DTC | <i>para</i>  | 2374                              | 2.908               | 0.481    | 2.619               | 0.289                              | 0.19                                | 58         |
| 3BPy- <i>m</i> DTC | <i>meta</i>  | 5833                              | 2.671               | 0.009    | 2.553               | 0.118                              | 0.05                                | 66         |

<sup>#</sup>Computed results, <sup>##</sup>Experimental results, <sup>\*</sup>Electroluminescence spectra

**Table S3.** Crystal data table of 3BPy-*p*DTC.

|                     |                    |
|---------------------|--------------------|
| Identification code | 3BPy- <i>p</i> DTC |
| Empirical formula   | C52 H55 N3 O       |
| Formula weight      | 737.99             |
| Temperature         | 100(2) K           |
| Wavelength          | 1.54178 Å          |
| Crystal system      | Monoclinic         |

|                                   |                                                                                                                                  |
|-----------------------------------|----------------------------------------------------------------------------------------------------------------------------------|
| Space group                       | P 21/c                                                                                                                           |
| Unit cell dimensions              | a = 23.1420(5) Å, $\alpha = 90^\circ$<br>b = 16.9301(4) Å, $\beta = 110.9490(10)^\circ$<br>c = 23.0145(5) Å, $\gamma = 90^\circ$ |
| Volume                            | 8421.0(3) Å <sup>3</sup>                                                                                                         |
| Z                                 | 8                                                                                                                                |
| Density (calculated)              | 1.164 Mg/m <sup>3</sup>                                                                                                          |
| Absorption coefficient            | 0.526 mm <sup>-1</sup>                                                                                                           |
| F(000)                            | 3168                                                                                                                             |
| Crystal size                      | 0.08 x 0.07 x 0.07 mm <sup>3</sup>                                                                                               |
| Theta range for data collection   | 2.044 to 66.740°.                                                                                                                |
| Index ranges                      | -27<=h<=25, -20<=k<=20, -16<=l<=27                                                                                               |
| Reflections collected             | 58072                                                                                                                            |
| Independent reflections           | 14766 [R(int) = 0.0336]                                                                                                          |
| Completeness to theta = 67.679°   | 96.9 %                                                                                                                           |
| Absorption correction             | Semi-empirical from equivalents                                                                                                  |
| Max. and min. transmission        | 0.9492 and 0.8323                                                                                                                |
| Refinement method                 | Full-matrix least-squares on F <sup>2</sup>                                                                                      |
| Data / restraints / parameters    | 14766 / 126 / 1073                                                                                                               |
| Goodness-of-fit on F <sup>2</sup> | 1.027                                                                                                                            |
| Final R indices [I>2sigma(I)]     | R1 = 0.0517, wR2 = 0.1390                                                                                                        |
| R indices (all data)              | R1 = 0.0633, wR2 = 0.1487                                                                                                        |
| Largest diff. peak and hole       | 0.666 and -0.507 e.Å <sup>-3</sup>                                                                                               |
| <b>CCDC number</b>                | <b>2116276</b>                                                                                                                   |

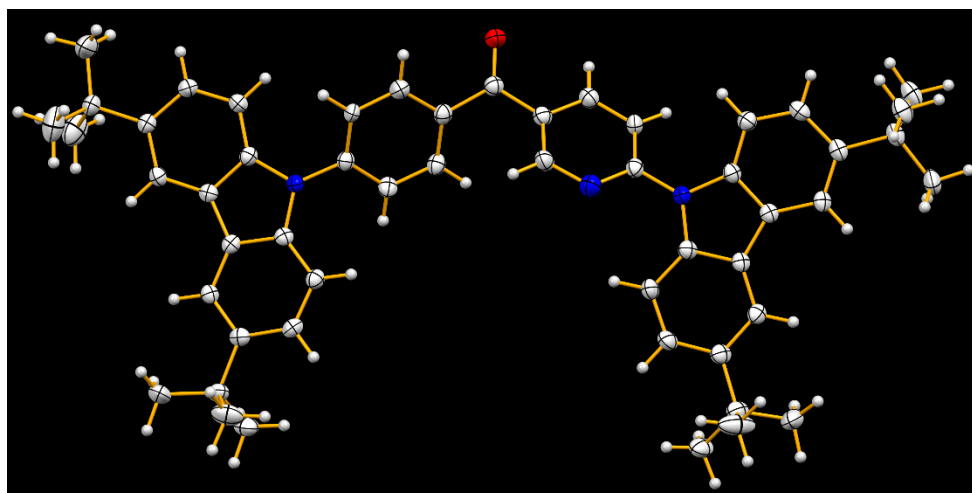

**Fig. S2** ORTEP diagram of 3BPY-*p*DTC obtained from single crystal X-ray analysis shown with 50% ellipsoids.

## 4. Spectroscopic Characterizations

### 4.1 Electronic absorption:

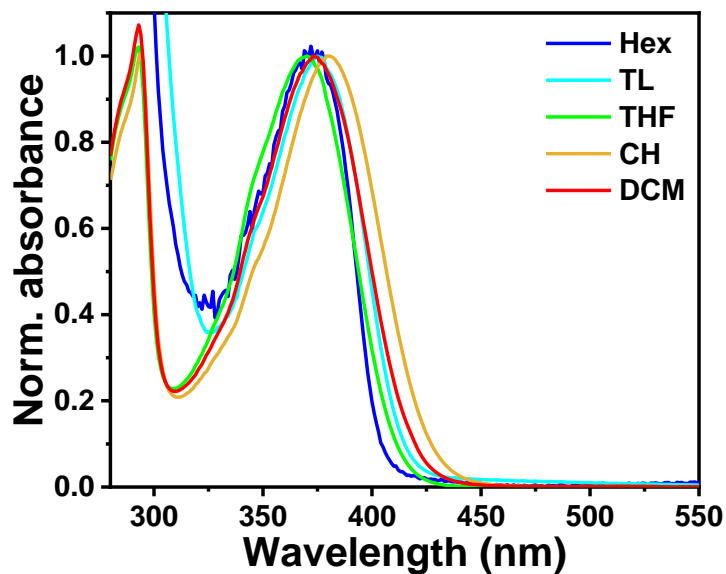

**Fig. S3** Normalized absorption spectra of 3BPY-*p*DTC in different solvents with varying polarity. Hex: Hexane (0.009), TL: toluene (0.099), THF: tetrahydrofuran (0.207), CH: chloroform (0.259) and DCM: dichloromethane (0.309). The solvent polarity parameter ( $E_T^N$  value) is mentioned in the parenthesis.

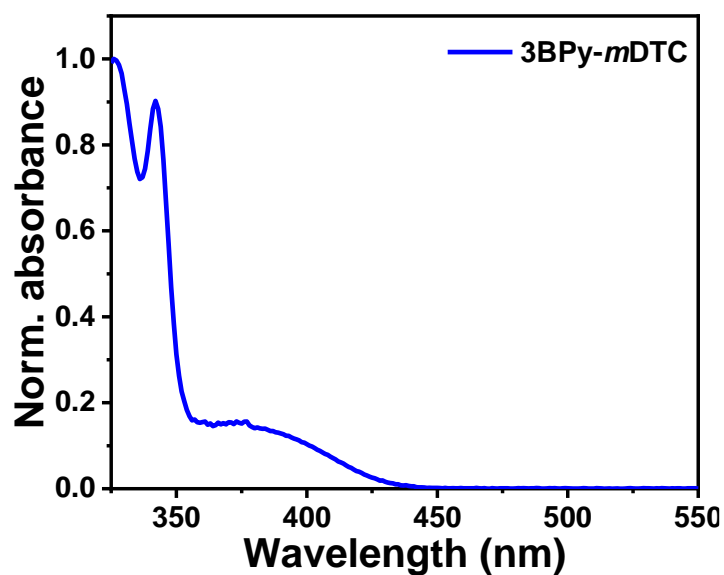

**Fig. S4** Normalized absorption spectrum of 3BPY-*m*DTC in toluene at room temperature.

## 4.2 Emission spectroscopy:

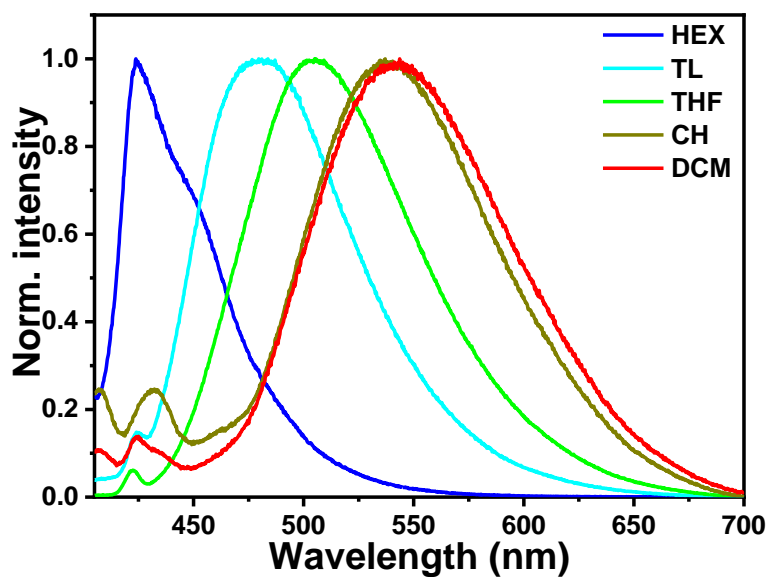

**Fig. S5** Normalized emission spectra ( $\lambda_{\text{ex}} = 385 \text{ nm}$ ) of 3BPY-*m*DTC in different solvents with varying polarity. Hex: Hexane (0.009), TL: toluene (0.099), THF: tetrahydrofuran (0.207), CH: chloroform (0.259) and DCM: dichloromethane (0.309). The solvent polarity parameter ( $E_T^N$  value) is mentioned in the parenthesis.

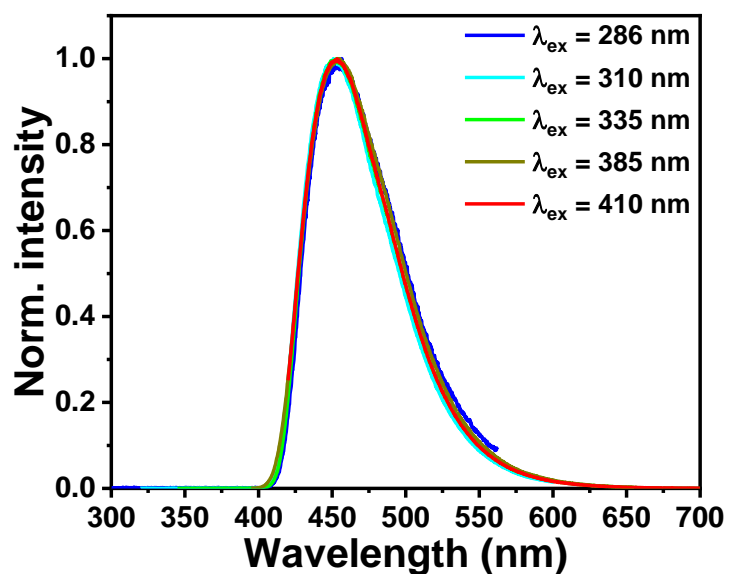

**Fig. S6** Normalized emission spectra of 3BPY-*p*DTC in toluene at room temperature with different excitation wavelengths.



**Table S4.** Spectroscopic data table of 3BPy-*p*DTC

| Solvent | $E_T^N$ | Orientation polarizability ( $\Delta f$ ) | $\lambda_{abs}$ (nm) | $\lambda_{em}$ (nm) | Stokes shift (nm) | $\Delta\nu$ (cm <sup>-1</sup> ) | FWHM (nm) |
|---------|---------|-------------------------------------------|----------------------|---------------------|-------------------|---------------------------------|-----------|
| HEX     | 0.009   | 0.0012                                    | 370                  | 434                 | <b>64</b>         | 3986                            | 66        |
| TL      | 0.099   | 0.014                                     | 375                  | 453                 | <b>78</b>         | 4591                            | 73        |
| THF     | 0.207   | 0.210                                     | 369                  | 495                 | <b>126</b>        | 6898                            | 97        |
| CH      | 0.259   | 0.1488                                    | 374                  | 512                 | <b>138</b>        | 7207                            | 99        |
| DCM     | 0.309   | 0.217                                     | 373                  | 530                 | <b>157</b>        | 7941                            | 108       |

**Table S5.** Spectroscopic data table of 3BPy-*m*DTC

| Solvent | $E_T^N$ | Orientation polarizability ( $\Delta f$ ) | $\lambda_{abs}$ (nm) | $\lambda_{em}$ (nm) | Stokes shift (nm) | $\Delta\nu$ (cm <sup>-1</sup> ) |
|---------|---------|-------------------------------------------|----------------------|---------------------|-------------------|---------------------------------|
| HEX     | 0.009   | 0.0012                                    | 380                  | 424                 | <b>44</b>         | 2731                            |
| TL      | 0.099   | 0.014                                     | 382                  | 480                 | <b>98</b>         | 5345                            |
| THF     | 0.207   | 0.210                                     | 378                  | 505                 | <b>127</b>        | 6654                            |
| CH      | 0.259   | 0.1488                                    | 380                  | 538                 | <b>158</b>        | 7728                            |
| DCM     | 0.309   | 0.217                                     | 378                  | 542                 | <b>164</b>        | 8005                            |

### 4.3 Lippert-Mataga Equation:

Solvent-dependent shifts in the fluorescence maxima of the molecules can be mainly attributed to the dipole-dipole interactions between the fluorophore and solvent.<sup>4, 5</sup> Positive solvatochromism is observed when there is a redshift in emission with increasing the solvent polarity. This is because of the stabilized excited state. The Lippert-Mataga (L-M) theory describes the solvent dependence spectral shifts as given in Eq. 1.

$$\Delta\nu = \bar{\nu}_a - \bar{\nu}_f = \frac{2}{hc} \left( \frac{\varepsilon - 1}{2\varepsilon + 1} - \frac{n^2 - 1}{2n^2 + 1} \right) \frac{(\mu_E - \mu_G)^2}{a^3} + constant \quad \dots (1)$$

Where:  $\bar{\nu}_a = \frac{1}{\lambda_{abs}^{max}}$ ,  $\bar{\nu}_f = \frac{1}{\lambda_{em}^{max}}$  and  $\Delta f = \left( \frac{\varepsilon - 1}{2\varepsilon + 1} - \frac{n^2 - 1}{2n^2 + 1} \right) \quad \dots (2)$

In this theory, specific solvent-fluorophore interactions, such as hydrogen bonding are not included. Eq. 1 shows Stokes shift ( $\Delta\bar{\nu}$ ) depends on the dipole moments of the fluorophore in the ground ( $\mu_G$ ) and the excited ( $\mu_E$ ) state, respectively. It also depends on the dielectric constant ( $\varepsilon$ ) and the refractive index ( $n$ ) of the corresponding solvent.  $\bar{\nu}_a$  and  $\bar{\nu}_f$  represent the wavenumbers of the absorption and the fluorescence emission, respectively,  $h$  is the Planck's constant,  $c$  is the speed of light in vacuum, and  $a$  is the Onsager radius of the cavity in which the fluorophore resides.  $\Delta f$  is the orientation polarizability of the solvent (Eq. 2). Plotting the Stokes shift as a function of the orientation polarizability of the solvents gives the Lippert-Mataga plot (Fig. S7-S8).

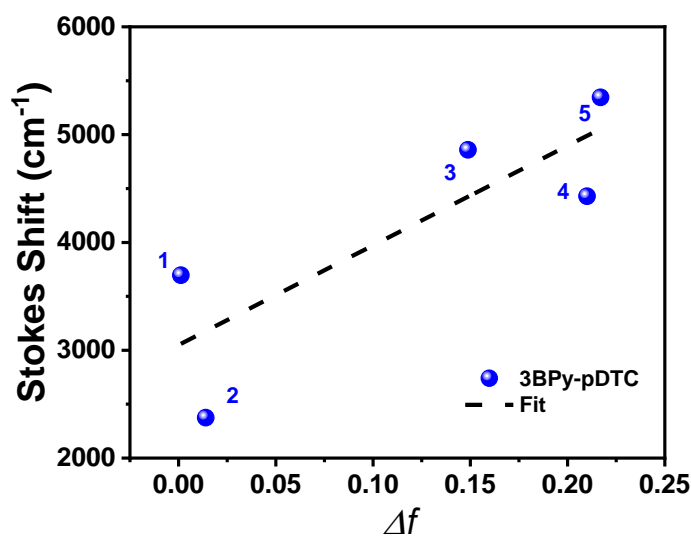

**Fig. S7** Lippert-Mataga plot depicting Stokes shift ( $\Delta\bar{\nu}$ ) versus the solvent orientation polarizability ( $\Delta f$ ) of 3BPy-*p*DTC. The numbers refer to the solvents: (1) Hexane, (2) toluene, (3) tetrahydrofuran, (4) chloroform and (5) dichloromethane. The dashed line represents the best linear fit to the data points.

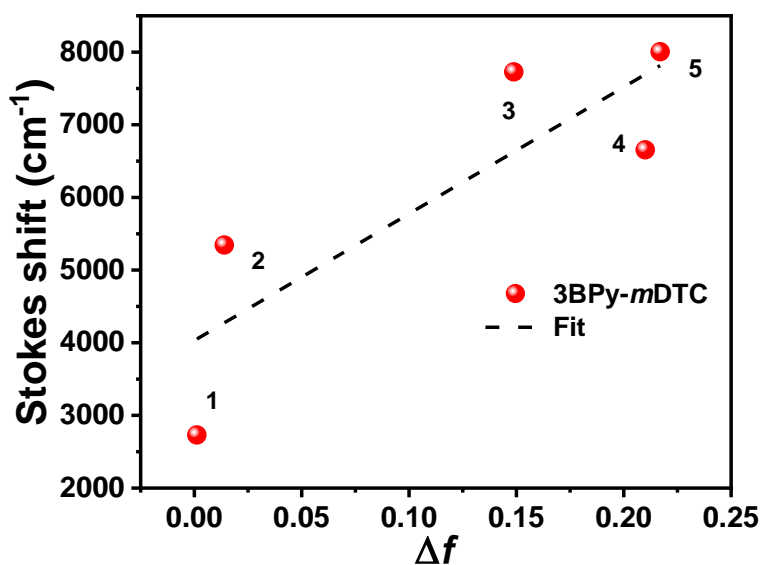

**Fig. S8** Lippert-Mataga plot depicting Stokes shift ( $\Delta\bar{\nu}$ ) versus the solvent orientation polarizability ( $\Delta f$ ) of 3BPy-*m*DTC. The numbers refer to the solvents: (1) Hexane, (2) toluene, (3) tetrahydrofuran, (4) chloroform and (5) dichloromethane. The dashed line represents the best linear fit to the data points.

The change of the dipole moment ( $\Delta\mu$ ) can be estimated using the equation (1) from the slope obtained from the L-M plot as following

$$(\mu_E - \mu_G)^2 = \frac{\text{Slope} * (hca^3)}{2} \dots (3)$$

$\Delta\mu$  ( $\mu_E - \mu_G$ ) is the change of dipole moment from the ground to an excited state.

**Table S6** Fitting parameters of Lippert-Mataga plots and calculated Onsager radius ( $a$ ),  $\Delta\mu$  ( $\mu_E - \mu_G$ ) refers the change in dipole moment. ( $R^2$ : goodness of fit)

| Compound           | Slope ( $\text{cm}^{-1}$ ) | $R^2$ | $a$ ( $\text{\AA}$ ) <sup>#</sup> | ( $\mu_E - \mu_G$ ) D |
|--------------------|----------------------------|-------|-----------------------------------|-----------------------|
| 3BPy- <i>p</i> DTC | 15882                      | 0.92  | 6.61                              | <b>21</b>             |
| 3BPy- <i>m</i> DTC | 17442                      | 0.72  | 7.30                              | <b>26</b>             |

<sup>#</sup>The Onsager radius can be calculated from the geometry optimized structure of the compounds using DFT minimization in Gaussian program (B3LYP functional using 6-31G-(d) orbital base.<sup>6</sup>

#### 4.4 Fluorescence quantum yield measurement:

The photoluminescence quantum yield (PLQY) of 3BPy-*p*DTC was estimated by comparison with 9,10-diphenylanthracene dye in toluene ( $\Phi_f = 0.95$ ).<sup>7, 8</sup>

$$\Phi_{f,x} = \Phi_{f,s} \times \frac{F_X}{F_S} \times \frac{f_S}{f_X} \times \frac{n_X^2}{n_S^2} \dots (4)$$

Where  $\Phi_f$  is the fluorescence quantum yield, the subscript  $x$  denotes sample, and the subscript  $s$  refers to the standard dye.  $F$  denotes integral fluorescence,  $n$  refers to the refractive index of the solvent used in the measurements and  $f$  is the absorption factor at the excitation wavelength given by the following equation:  $f = 1 - 10^{-\varepsilon(\lambda_{ex})cl} = 1 - 10^{-A(\lambda_{ex})}$ , where  $A$  is the absorbance, and  $\varepsilon$  = molar extinction coefficient in  $\text{L mol}^{-1} \text{cm}^{-1}$ .

#### 4.5 Time-resolved spectroscopy:

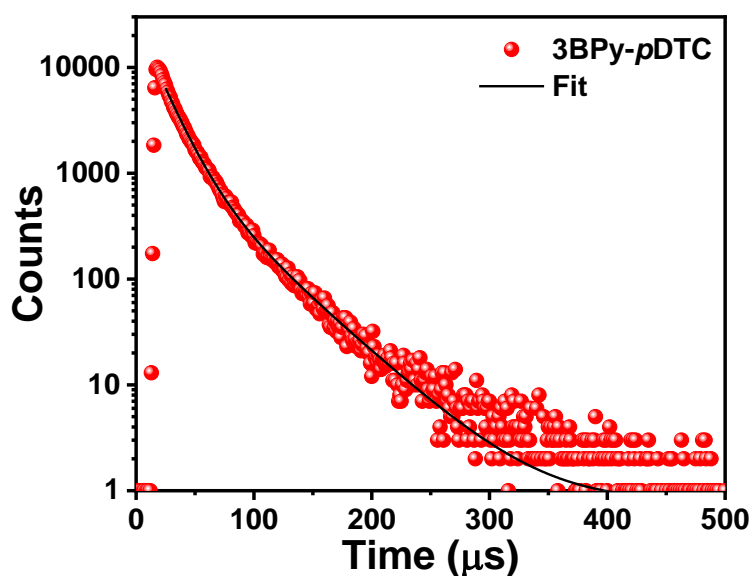

**Fig. S9.** Emission decay profile of 3BPy-*p*DTC ( $\lambda_{ex} = 375$  nm,  $\lambda_{em} = 470$  nm) film doped in PMMA matrix at room temperature.

**Table S7.** Emission decay parameters ( $\lambda_{ex}= 375$  nm,  $\lambda_{em}= 450$  nm) of 3BPy-*p*DTC in toluene (TL), 10 wt% PMMA film at room temperature; the decay times ( $\tau_1$ , and  $\tau_2$ ), the respective fractional contributions ( $\alpha_1$ , and  $\alpha_2$  mentioned in parentheses), the weighted average decay time ( $\tau_{avg.}$ ) and the quality of fitting ( $\chi^2$ ) are shown.

| Sample | Timescales | $\tau_1$ | $\alpha_1$ | $\tau_2$ | $\alpha_2$ | $\tau_{avg.}$ | $\chi^2$ |
|--------|------------|----------|------------|----------|------------|---------------|----------|
| TL     | ns         | 0.8      | 69         | 3.2      | 31         | 1.5           | 1.18     |
|        | $\mu$ s    | 5.2      | 77         | 16.2     | 23         | 7.73          | 1.24     |
| PMMA   | $\mu$ s    | 15.9     | 64         | 43.7     | 36         | 25.9          | 1.00     |

## 5. Electrochemical measurement

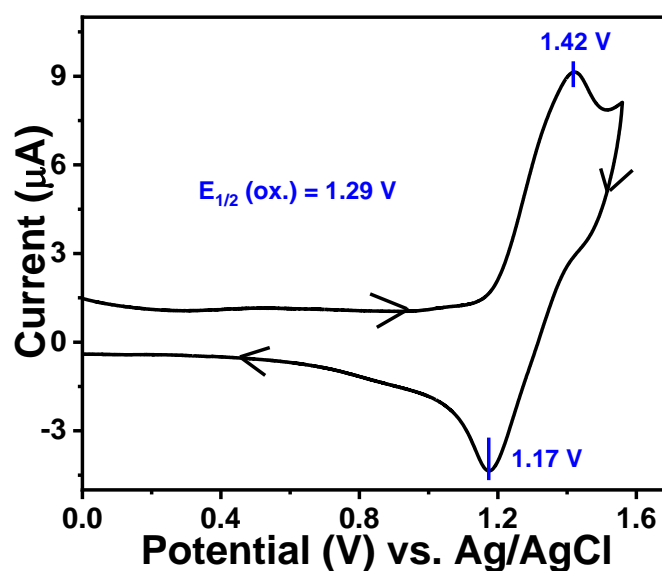

**Fig. S10.** Cyclic voltammogram (100 mV/s) of 3BPy-*p*DTC in dry dichloromethane (1 mM solution) using 0.1 M tetrabutylammonium hexafluorophosphate (TBAP) as supporting electrolyte and Pt as the working electrode and Ag/AgCl as a reference electrode.

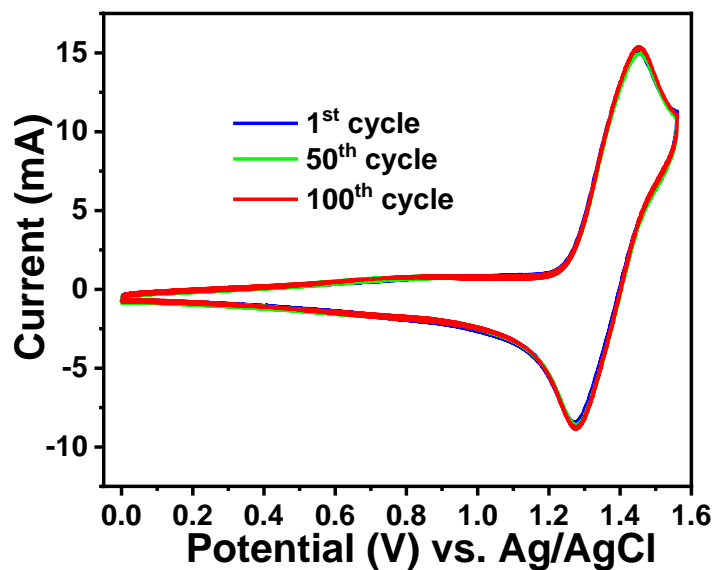

**Fig. S11** Electrochemical stability of 3BPy-*p*DTC in DCM up to 100 cycles at a scan rate of 100 mV/s vs. Ag/AgCl.

## 6. Thermal stability and photostability

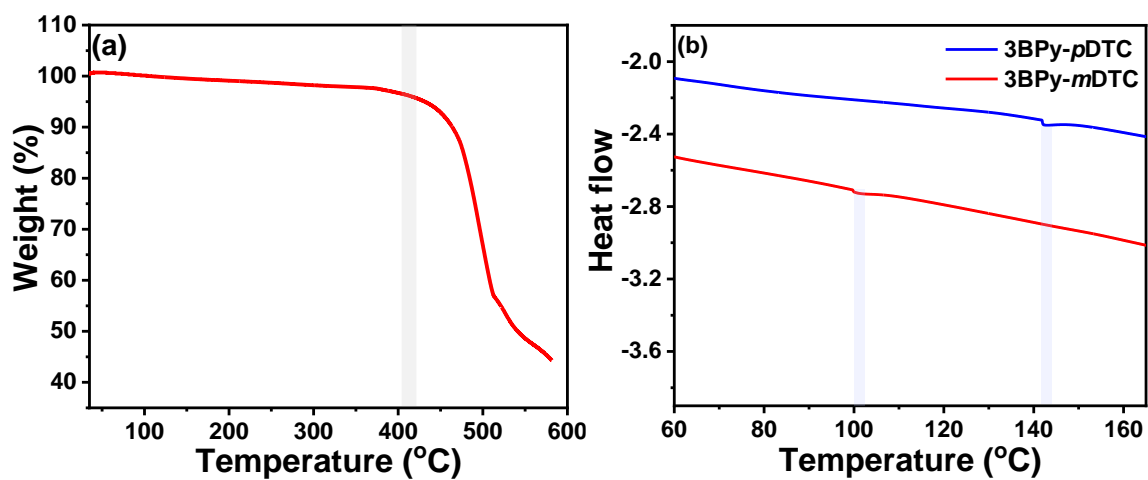

**Fig. S12** (a) Thermogravimetric analysis (TGA) graph of 3BPy-*p*DTC in nitrogen atmosphere and (b) differential scanning calorimetry (DSC) graphs of 3BPy-*p*DTC and 3BPy-*m*DTC.

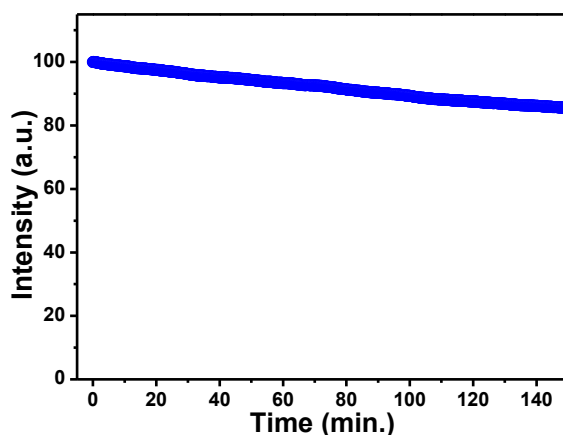

**Fig. S13** The fluorescence intensity profile of 3BPy-*p*DTC film doped in PMMA matrix ( $\lambda_{\text{ex.}} = 375$  and  $\lambda_{\text{em.}} = 455$  nm) with time. The continuous irradiation of 150 W xenon lamp for over 2.5 hours depicting the photostability.

## 7. Device Fabrication

The organic materials used for the OLED device fabrication were purified by sublimation. Devices were fabricated by vacuum deposition onto pre-coated ITO glass with sheet resistance of  $15 \Omega/\text{square}$  at a pressure lower than  $10^{-6}$  Torr. The organic materials were deposited at the rate of  $0.5\sim 1.2 \text{ \AA s}^{-1}$ . LiF and Al were deposited at the rate of  $0.1 \text{ \AA s}^{-1}$ ,  $3\sim 10 \text{ \AA s}^{-1}$ , respectively. The rest of the procedures are similar to the reported method.<sup>1, 9, 10</sup>

The transient electroluminescence measurements were carried out on a function generator (Agilent 8114A) and an indigenously developed time-resolved emission spectrometer. The devices were driven by a voltage pulse 6 V with a repetition rate of 20 kHz and pulse width of 10  $\mu\text{s}$ . The emission decay curves at specific wavelengths were gained using a cooled photomultiplier tube (PMT) detector (Becker & Hickl GmbH PMC-100) integrated with a 300 nm focal length monochromator (Princeton Instruments Acton SP2300). The time-resolved photon counting was done via a multichannel scaling (MCS) card (Becker & Hickl GmbH MSA-300) with a time resolution of 5 ns. The whole system was synchronized with a digital delay generator (Stanford Research Systems DG645).

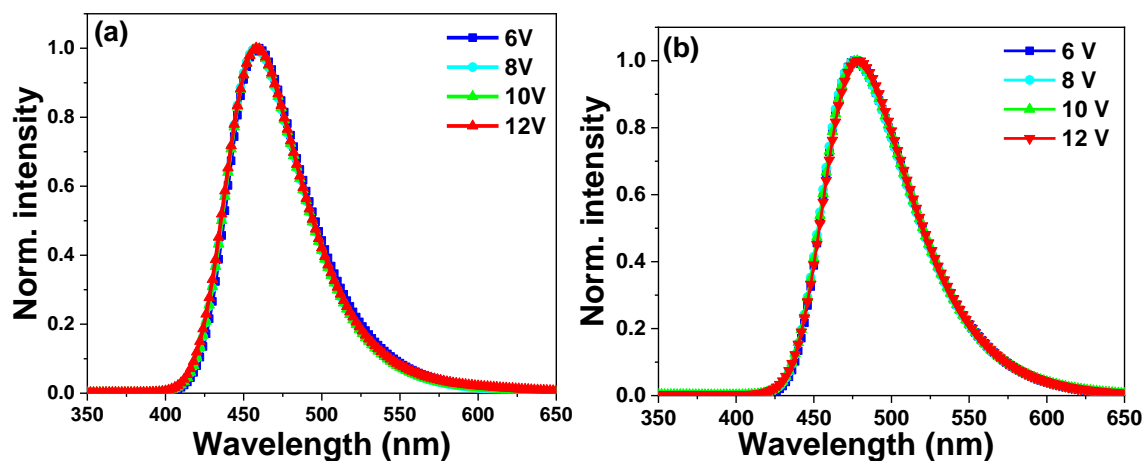

**Fig. S14** Normalized electroluminescence spectra of (a) 3BPy-*p*DTC and (b) 3BPy-*m*DTC with varying voltages depicting the stability and colour purity.

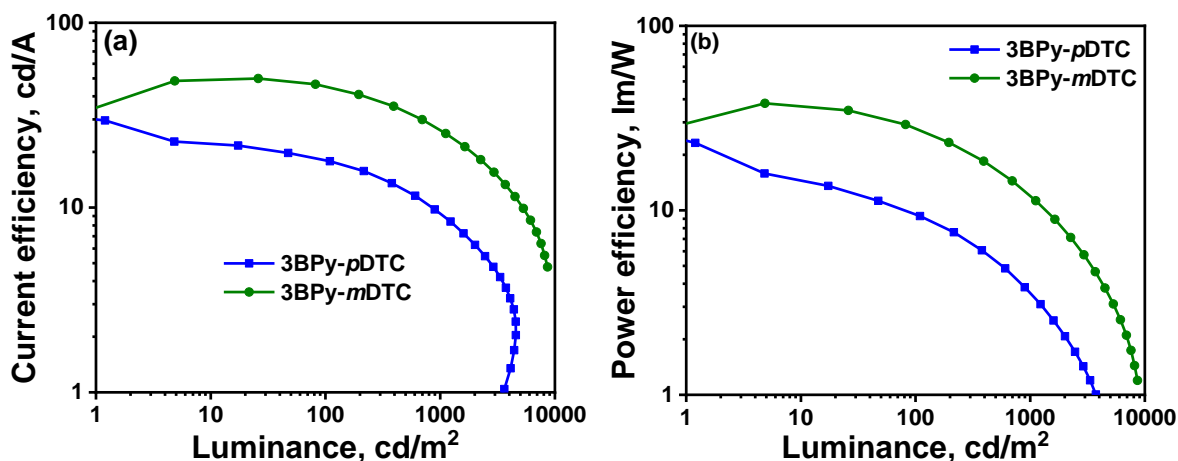

**Fig. S15** (a) The current efficiency vs luminance, (b) power efficiency vs luminance of 3BPy-*p*DTC and 3BPy-*m*DTC devices.

**Table S8.** A comparative table for the blue TADF and MR-TADF emitters with CIE<sub>y</sub> is ≤0.15.

| Nature of Emitters | Molecules          | $\lambda_{em}$ (nm, eV) | FWHM (nm, eV) | CIE          | EQE <sub>max</sub> (%) | Citation                                                                                                                                  |
|--------------------|--------------------|-------------------------|---------------|--------------|------------------------|-------------------------------------------------------------------------------------------------------------------------------------------|
| TADF               | 3BPy- <i>p</i> DTC | 458                     | 58            | (0.14, 0.13) | 25%                    | <b>This work</b>                                                                                                                          |
| TADF               | ICz-DPS            | 435                     | NR            | (0.15, 0.08) | 11.7%                  | <i>ACS Appl. Mater. Interfaces</i> <b>2021</b> , DOI: <a href="https://doi.org/10.1021/acsami.1c17449">10.1021/acsami.1c17449</a>         |
| TADF               | tBuPCAPIC N        | 452                     | 53            | (0.15, 0.11) | 12.7%                  | <i>CCS Chem.</i> , <b>2020</b> , 2, 2557                                                                                                  |
| TADF               | TDBA-SBA           | 467                     | 55            | (0.13, 0.15) | 29.3%                  | <i>Chem. Eng. J.</i> , <b>2021</b> , DOI: <a href="https://doi.org/10.1016/j.cej.2021.133598">10.1016/j.cej.2021.133598</a>               |
| TADF               | HAP-3DPA           | 440                     | NR            | (0.16, 0.13) | 12.5%                  | <i>Photonics</i> <b>2021</b> , 8, 293.<br><a href="https://doi.org/10.3390/Photonics8080293">https://doi.org/10.3390/Photonics8080293</a> |

|                   |                                 |             |                   |                                     |                 |                                                                                                                                 |
|-------------------|---------------------------------|-------------|-------------------|-------------------------------------|-----------------|---------------------------------------------------------------------------------------------------------------------------------|
| TADF              | BNNIO                           | 415         | NR                | (0.150,<br>0.076)                   | -               | <i>J. Phys. Chem. Lett.</i> <b>2021</b> , <i>12</i> , 9501                                                                      |
| TADF              | OBO-I                           | 457         | 60                | (0.14,<br>0.10)                     | 21.7%           | <i>Adv. Optical Mater.</i> <b>2021</b> , 2101282                                                                                |
| TADF/<br>HyperFlu | DBA-<br>BFICz/<br>DBA-<br>BTICz | 476/<br>473 | 64/19             | (0.15,<br>0.24)/<br>(0.12,<br>0.15) | 33.2/38.8<br>%  | <i>Adv. Funct. Mater.</i> <b>2021</b> , <i>31</i> , 2105805                                                                     |
| TADF              | sAC-sDBB                        | 452         | 51                | (0.155,<br>0.089)                   | 22.5            | <i>Angew. Chem. Int. Ed.</i> <b>2021</b> , <i>60</i> , 9598                                                                     |
| TADF              | TDBA-SAF                        | 456         | 55                | (0.142,<br>0.090)                   | 28.2            | <i>Adv. Mater.</i> <b>2020</b> , <i>32</i> , 2004083                                                                            |
| TADF              | TDBA-Ac                         | -           | 48                | (0.15,<br>0.06)                     | 21.5%           | <i>Nat. Photonics</i> , <b>2019</b> , <i>13</i> , 540                                                                           |
| TADF              | BFCZPZ1                         | 436         | 59                | (0.15,<br>0.06)                     | 6.5%            | <i>Chem. Eng. J.</i> <b>2021</b> ,<br><a href="https://doi.org/10.1016/j.cej.2020.127591">doi.org/10.1016/j.cej.2020.127591</a> |
| TADF              | 2CzBN                           | 433         | 70                | (0.15,<br>0.07)                     | 11.4            | <i>Chem. Eng. J.</i> <b>2021</b> , <i>416</i> , 129097                                                                          |
| TADF              | DMACpB                          | 471         | NR                | (0.138,<br>0.142)                   | 20%             | <i>Dyes Pigm.</i> <b>2021</b> , <i>188</i> , 109224                                                                             |
| TADF              | PXZN-B<br>DMACN-B               | 468<br>444  | 48<br>44          | (0.13,<br>0.147/<br>0.15,<br>0.045) | 12.7%<br>10%    | <i>Adv. Funct. Mater.</i> <b>2021</b> , <i>31</i> , 2009488                                                                     |
| TADF              | DPFCz-<br>TRZ                   | 445         | 65                | (0.15,<br>0.10)                     | 15%             | <i>ChemPhotoChem</i> <b>2020</b> , <i>4</i> , 321                                                                               |
| TADF              | TXADO-<br>spiro-<br>DMACF       | 444         | 54 (neat<br>film) | (0.16,<br>0.09)                     | 5.3%            | <i>ACS Omega</i> <b>2019</b> , <i>4</i> , 1861                                                                                  |
| TADF              | DMAC2PT<br>O                    | 448         | 50                | (0.154,<br>0.108)                   | 15.2%           | <i>Dyes Pigm.</i> <b>2020</b> , <i>178</i> , 108367                                                                             |
| TADF              | DtBuAc-<br>DBT                  | 455         | 84                | (0.133,<br>0.129)                   | 10.5%           | <i>J. Mater. Chem. C</i> <b>2019</b> , <i>7</i> , 13224                                                                         |
| TADF              | pDTCz-<br>3DPyS                 | 452         | NR                | (0.15,<br>0.13)                     | 13.4%           | <i>J. Mater. Chem. C</i> <b>2019</b> , <i>7</i> , 6664                                                                          |
| TADF              | PXB-mIC                         | 438<br>(PL) | NR                | (0.15,<br>0.08)                     | 12.5%           | <i>ACS Appl. Mater. Interfaces</i> <b>2019</b> , <i>11</i> , 14909                                                              |
| TADF              | TXAZ                            | 456         | 69                | (0.148,<br>0.131)                   | 16%             | <i>ACS Appl. Mater. Interfaces</i> <b>2019</b> , <i>11</i> , 7199                                                               |
| TADF              | CNICCz/<br>CNICtCz              | 449/<br>456 | 56/<br>60         | (0.15,<br>0.08)/<br>(0.14,<br>0.13) | 12.4%/<br>16.0% | <i>J. Mater. Chem. C</i> <b>2018</b> , <i>6</i> , 5012                                                                          |
| TADF              | CzOMeoB                         | 449         | NR                | (0.151,<br>0.058)                   | 14.9%           | <i>Adv. Optical Mater.</i> <b>2018</b> , <i>6</i> , 1800385                                                                     |
| TADF              | FA-TA                           | NR          | NR                | (0.15,<br>0.13)                     | 11.2%           | <i>Adv. Mater.</i> <b>2018</b> , <i>30</i> , 1705641                                                                            |
| TADF              | DCzBN3                          | 428         | 65                | (0.156,<br>0.063)                   | 10.3%           | <i>Adv. Funct. Mater.</i> <b>2018</b> , <i>28</i> , 1706023                                                                     |
| TADF              | Ac-3MHPM                        | 451         | NR                | (0.16,<br>0.15)                     | 17.8%           | <i>ACS Appl. Mater. Interfaces</i> <b>2017</b> , <i>9</i> , 4742                                                                |
| TADF              | CzoB                            | 466         | NR                | (0.139,<br>0.150)                   | 22.6%           | <i>ACS Appl. Mater. Interfaces</i> <b>2017</b> , <i>9</i> , 24035                                                               |
| TADF              | Cz-TRZ3                         | 435<br>(TL) | NR                | (0.14,<br>0.098)                    | 19.2%           | <i>Angew. Chem. Int. Ed.</i> <b>2017</b> , <i>56</i> , 1571                                                                     |
| TADF              | ICzAc                           | 454         | 56                | (0.15,<br>0.09)                     | 13.7%           | <i>ACS Appl. Mater. Interfaces</i> <b>2017</b> , <i>9</i> ,                                                                     |



|                     |                               |             |           |                                   |                 |                                                                                                                                           |
|---------------------|-------------------------------|-------------|-----------|-----------------------------------|-----------------|-------------------------------------------------------------------------------------------------------------------------------------------|
| <b>TADF</b>         | PX-SBA                        | 448         | NR        | (0.16,<br>0.13)                   | 17.8%           | <i>Chem. Mater.</i> <b>2017</b> , 29, 8630                                                                                                |
| <b>TADF</b>         | acridan–<br>pyrimidine<br>(5) | 458         | NR        | (0.15,<br>0.15)                   | 11.4%           | <i>Chem. Sci.</i> , <b>2017</b> , 8, 953                                                                                                  |
| <b>TADF</b>         | CzBPCN                        | 460         | 48        | (0.14,<br>0.12)                   | 14%             | <i>Chem. Mater.</i> <b>2016</b> , 28, 5400                                                                                                |
| <b>TADF</b>         | DCzTrz                        | 2.89<br>eV  | NR        | (0.15,<br>0.14)                   | 16.6%           | <i>Adv. Mater.</i> <b>2015</b> , 27, 2515                                                                                                 |
| <b>MR-<br/>TADF</b> | tDPAC-BN                      | 440         | 19        | (0.135,<br>0.094)                 | 21.6%           | <i>Chem. Eng. J.</i> , <b>2021</b> ,<br><a href="https://doi.org/10.1016/j.cej.2021.133221">https://doi.org/10.1016/j.cej.2021.133221</a> |
| <b>MR-<br/>TADF</b> | QA-1/<br>QA-2                 | 455/<br>463 | 49/<br>37 | (0.14,<br>0.12)/<br>0.13,<br>0.14 | 17.1%/<br>19.0% | <i>Angew. Chem. Int. Ed.</i> <b>2021</b> , 60,<br>7643                                                                                    |
| <b>MR-<br/>TADF</b> | DABNA-<br>NP-TB               | 457         | 33        | (0.14,<br>0.11)                   | 19.5%           | <i>Angew. Chem. Int. Ed.</i> <b>2021</b> , 60,<br>2882                                                                                    |
| <b>MR-<br/>TADF</b> | t-DABNA                       |             | 31        | (0.13,<br>0.15)                   | 31.4%           | <i>J. Mater. Chem. C</i> <b>2019</b> , 7, 3082                                                                                            |
| <b>MR-<br/>TADF</b> | B2                            | 460         | 37        | (0.13,<br>0.11)                   | 18.3%           | <i>J. Am. Chem. Soc.</i> <b>2018</b> , 140,<br>1195                                                                                       |
| <b>MR-<br/>TADF</b> | DABNA-2                       | 467         | 28        | (0.12,<br>0.13)                   | 20.2%           | <i>Adv. Mater.</i> <b>2016</b> , 28, 2777                                                                                                 |
| <b>MR-<br/>TADF</b> | v-DABNA                       | 469         | 18        | (0.12,<br>0.11)                   | 34.4%           | <i>Nat. Photonics</i> <b>2019</b> , 13, 678                                                                                               |

NR = not reported

## 8. References

1. P. Rajamalli, V. Thangaraji, N. Senthilkumar, C.-C. Ren-Wu, H.-W. Lin and C.-H. Cheng, *J. Mater. Chem. C*, 2017, **5**, 2919-2926.
2. M. J. Frisch, G. W. Trucks, H. B. Schlegel, G. E. Scuseria, M. A. Robb, J. R. Cheeseman, G. Scalmani, V. Barone, G. A. Petersson, H. Nakatsuji, X. Li, M. Caricato, A. V. Marenich, J. Bloino, B. G. Janesko, R. Gomperts, B. Mennucci, H. P. Hratchian, J. V. Ortiz, A. F. Izmaylov, J. L. Sonnenberg, Williams, F. Ding, F. Lipparini, F. Egidi, J. Goings, B. Peng, A. Petrone, T. Henderson, D. Ranasinghe, V. G. Zakrzewski, J. Gao, N. Rega, G. Zheng, W. Liang, M. Hada, M. Ehara, K. Toyota, R. Fukuda, J. Hasegawa, M. Ishida, T. Nakajima, Y. Honda, O. Kitao, H. Nakai, T. Vreven, K. Throssell, J. A. Montgomery Jr., J. E. Peralta, F. Ogliaro, M. J. Bearpark, J. J. Heyd, E. N. Brothers, K. N. Kudin, V. N. Staroverov, T. A. Keith, R. Kobayashi, J. Normand, K. Raghavachari, A. P. Rendell, J. C. Burant, S. S. Iyengar, J. Tomasi, M. Cossi, J. M. Millam, M. Klene, C. Adamo, R. Cammi, J. W. Ochterski, R. L. Martin, K. Morokuma, O. Farkas, J. B. Foresman and D. J. Fox, *Gaussian 09*, Gaussian, Inc., Wallingford CT, 2016.
3. T. Lu and F. Chen, *J. Comput. Chem.*, 2012, **33**, 580-592.
4. J. R. Lakowicz, *Principles of fluorescence spectroscopy*, Springer, New York, 2006.
5. B. Sk, S. Khodia and A. Patra, *Chem. Commun.*, 2018, **54**, 1786-1789.
6. S. Mukherjee, A. Chattopadhyay, A. Samanta and T. Soujanya, *J. Phys. Chem.*, 1994, **98**, 2809-2812.
7. K. Rurack and M. Spieles, *Anal. Chem.*, 2011, **83**, 1232-1242.
8. C. Wurth, M. Grabolle, J. Pauli, M. Spieles and U. Resch-Genger, *Nat. Protoc.*, 2013, **8**, 1535-1550.
9. J.-J. Lin, W.-S. Liao, H.-J. Huang, F.-I. Wu and C.-H. Cheng, *Adv. Funct. Mater.*, 2008, **18**, 485-491.
10. P. Rajamalli, N. Senthilkumar, P. Gandeepan, P.-Y. Huang, M.-J. Huang, C.-Z. Ren-Wu, C.-Y. Yang, M.-J. Chiu, L.-K. Chu, H.-W. Lin and C.-H. Cheng, *J. Am. Chem. Soc.*, 2016, **138**, 628-634.

## 9. NMR Spectra

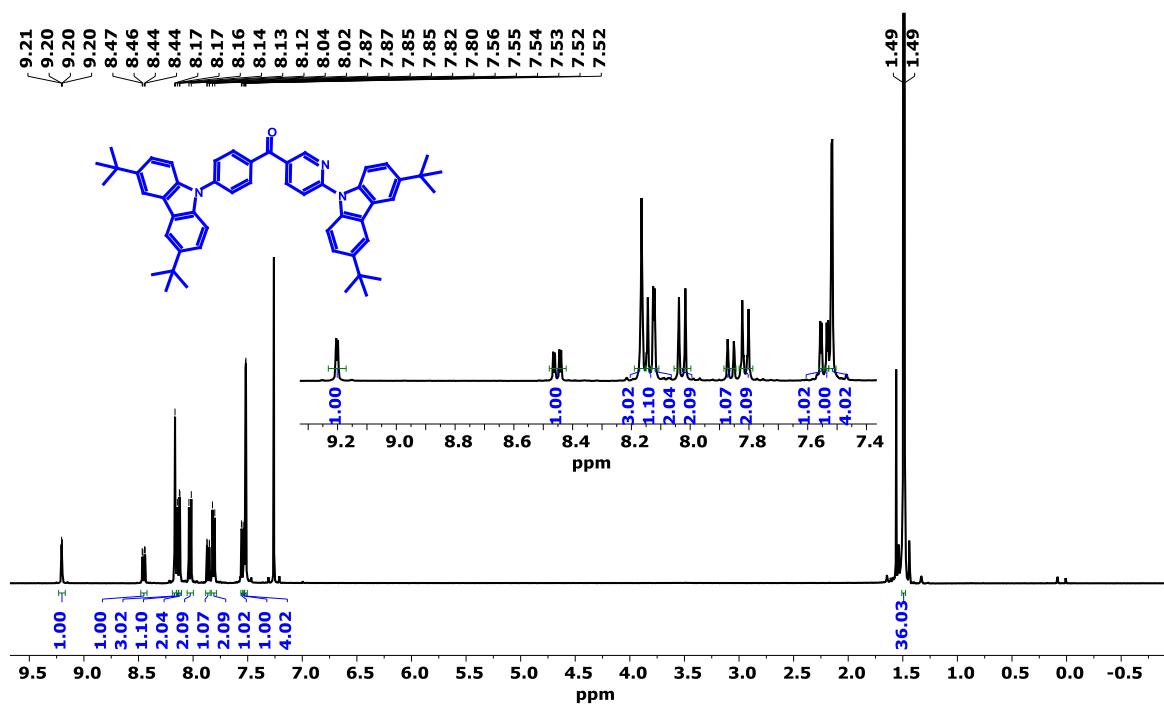

**Fig. S16** <sup>1</sup>H NMR spectrum of (4-(3,6-di-*tert*-butyl-9H-carbazol-9-yl)phenyl)(6-(3,6-di-*tert*-butyl-9H-carbazol-9-yl)pyridin-3-yl)methanone (**3BPY-pDTC**) in CDCl<sub>3</sub>.

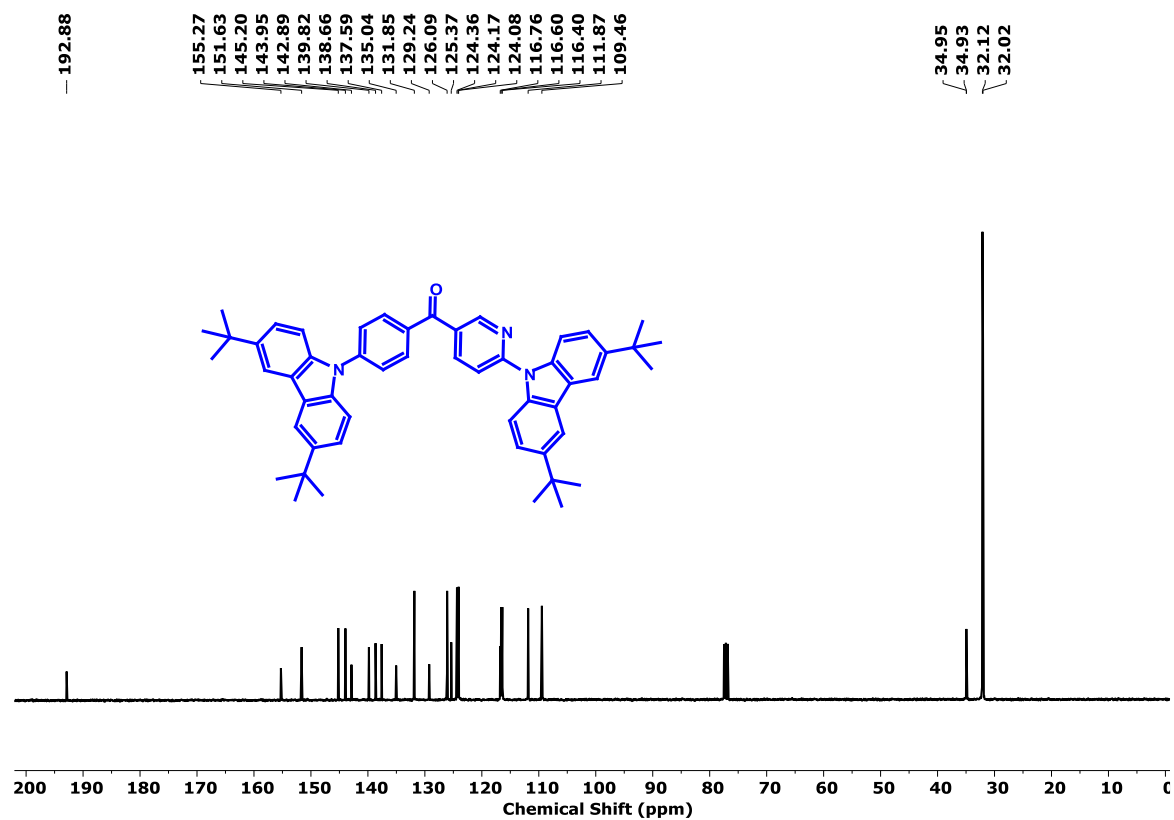

**Fig. S17** <sup>13</sup>C NMR spectrum of (4-(3,6-di-*tert*-butyl-9H-carbazol-9-yl)phenyl)(6-(3,6-di-*tert*-butyl-9H-carbazol-9-yl)pyridin-3-yl)methanone (**3BPY-pDTC**) in CDCl<sub>3</sub>.
